# Supplementary material for: Mutations in DNA repair genes are associated with increased neoantigen burden and a distinct immunophenotype in lung squamous cell carcinoma
Source: PubMed Central journal article supplement (PMC6397194; doi:10.1038/s41598-019-39594-4), 2019-03-01
Supplement: 41598_2019_39594_MOESM1_ESM.pdf [file 41598_2019_39594_MOESM1_ESM.pdf]

**Supplementary Figures and Tables**

**Mutations in DNA repair genes are associated with increased neoantigen burden and a distinct immunophenotype in lung squamous cell carcinoma**

Young Kwang Chae<sup>1,2\*</sup>, Jonathan F. Anker<sup>1\*</sup>, Michael S. Oh<sup>1\*</sup>, Preeti Bais<sup>3</sup>, Sandeep Namburi<sup>3</sup>, Sarita Agte<sup>1</sup>, Francis J. Giles<sup>1,2</sup>, Jeffrey H. Chuang<sup>3,4</sup>

**Supplementary Figure 1**

(a) Mutations in *BRCA1* and *BRCA2* were associated with increased mutation count as well as (b) increased neoantigen count. Statistical analysis completed with Student's t-test, \*\*\*  $p < 0.001$ , \*\*\*\*  $p < 0.0001$ . (c) Mutation burden was not significantly associated with patient smoking history.

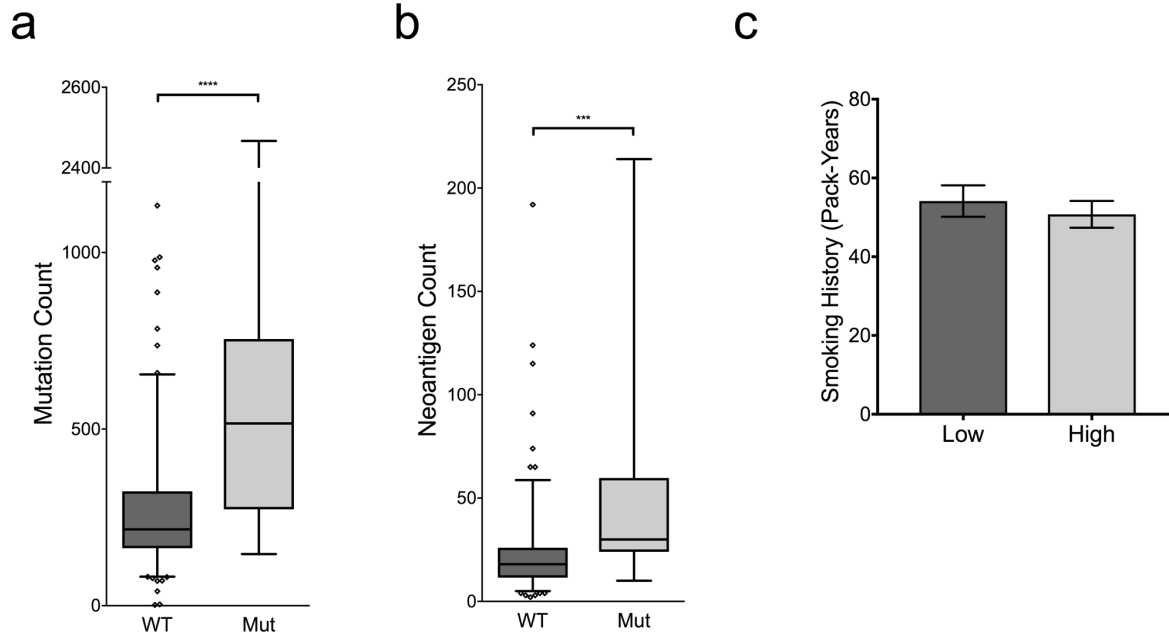

**Supplementary Figure 2**

(a) *TGFB1*, *TGFB3*, *WNT2*, and *WNT5A* had significant differences in expression between immunophenotypic groups (one-way ANOVA with Tukey's test for multiple comparison, \*  $p < 0.05$ , \*\*  $p < 0.01$ , \*\*\*  $p < 0.001$ ). (b) Mutations in Wnt and antigen presentation genes are depicted based on tumor groups. Samples within each group are arranged from highest mutation burden on the left to lowest mutation burden on the right.

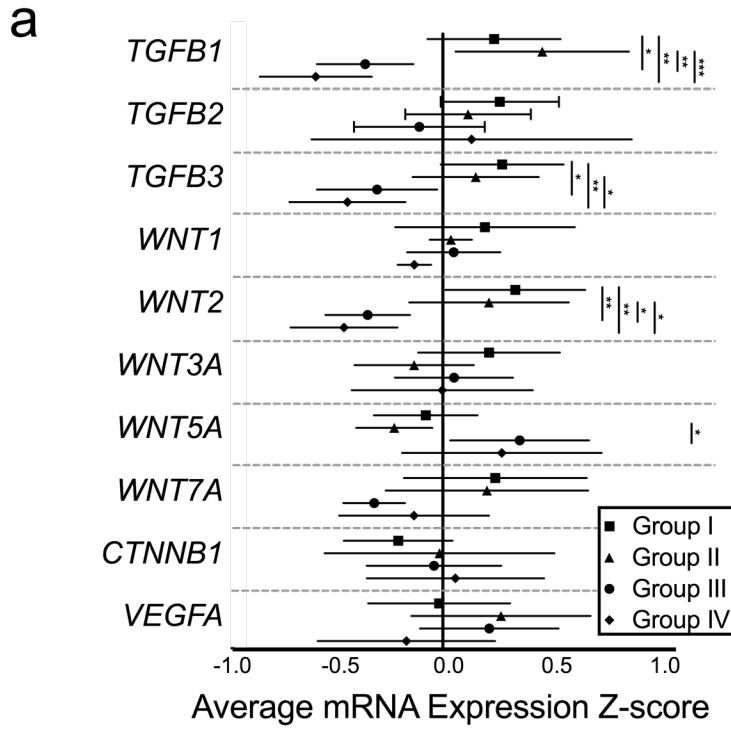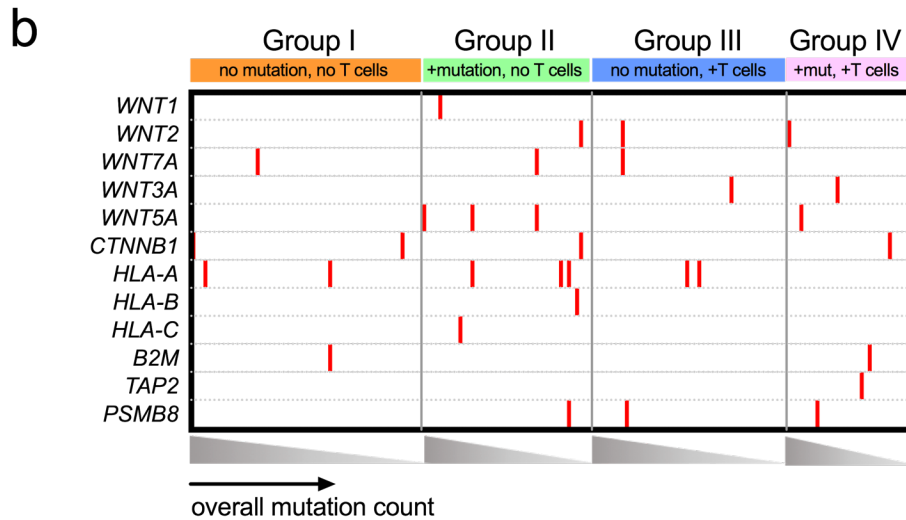

**Supplementary Figure 3**

(a) Two-dimensional plots show tumors color-coded based on activated CD4 and (b) CD8 infiltration. Samples are plotted based on *TGFB1* and *WNT2* expression, and stratified based on presence of DNA repair gene variants. P-values refer to gene expression differences in tumors with and without T cell infiltration (using Welch's two-sample t-test). (c) A heat map shows Pearson correlation coefficients between immune cell infiltration and either combined score, neoantigen burden, mutation burden, or repair gene mutations.

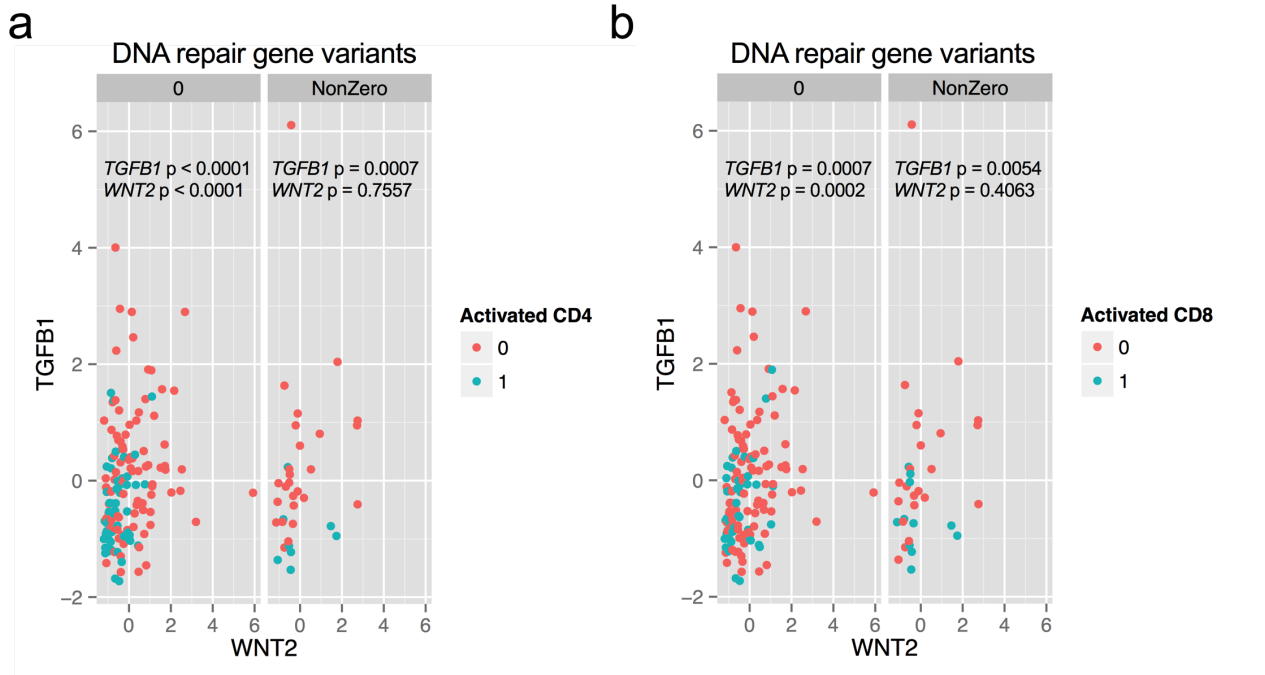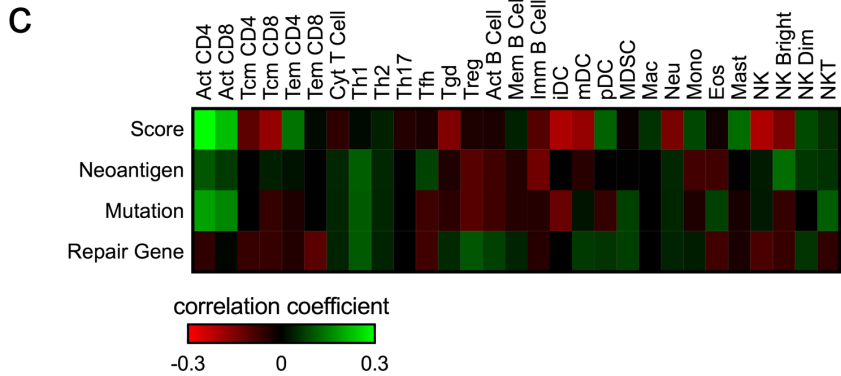

### Supplementary Figure 4

Heat map of mRNA expression of additional immune-related genes. Genes are ordered based on difference in average expression between high and low mutation burden tumors.

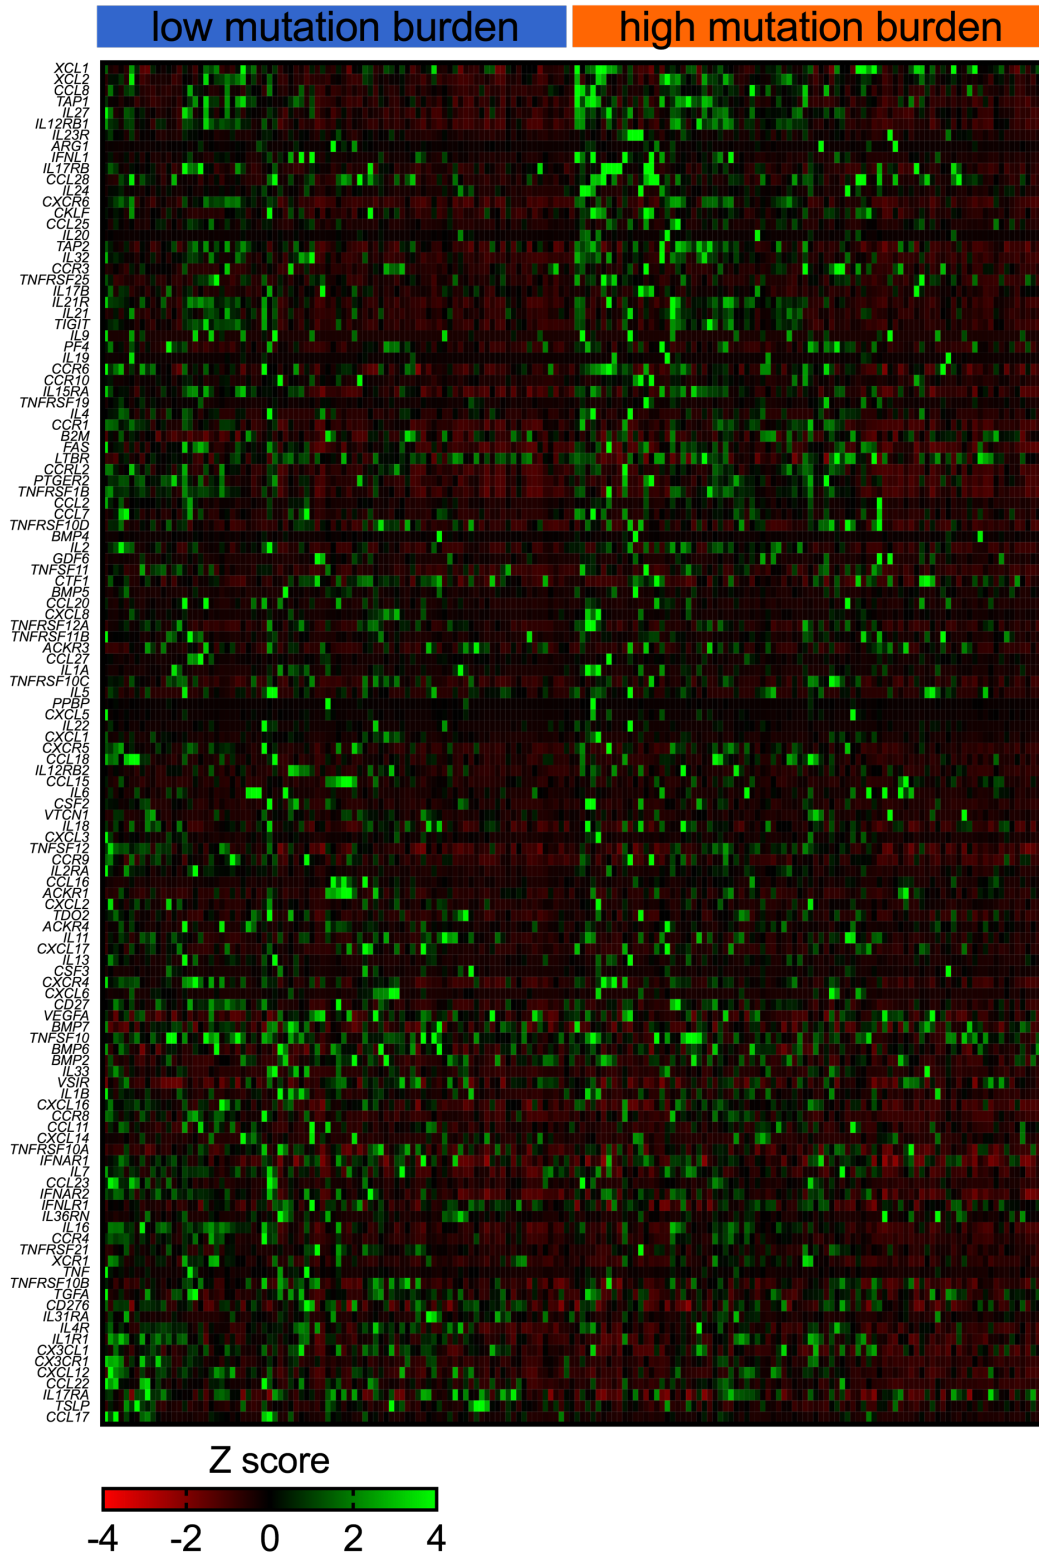

**Supplementary Figure 5**

(a) Mutation burden was not associated with histological subtypes of squamous cell carcinoma. (d) Variants in MMR genes were associated with greater proportion of tumors with secretory subtype (proportion Z-score, \* FDR-adjusted  $p < 0.05$ ).

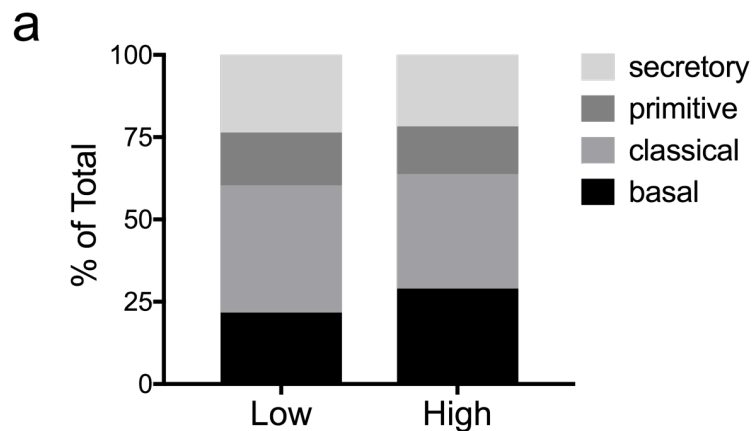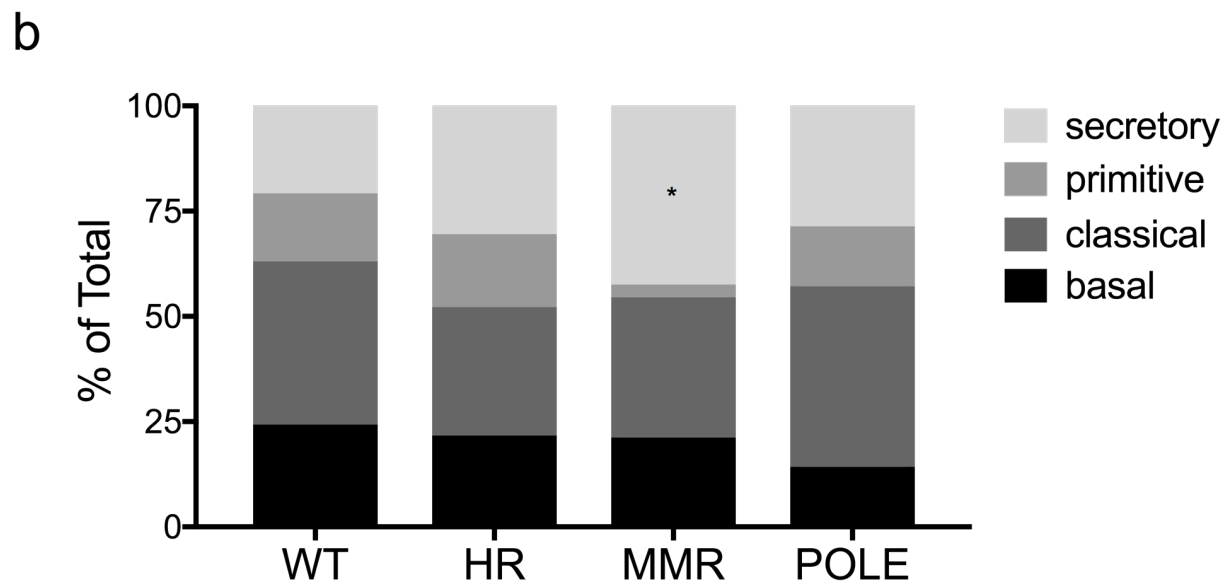

**Supplementary Figure 6**

Kaplan-Meier plots demonstrating (a) overall survival (OS) and (b) disease-free survival (DFS) in patients divided based on tumor groups (as defined in Figure 3b). There was no statistically-significant difference between groups based on log-rank test with either OS or DFS.

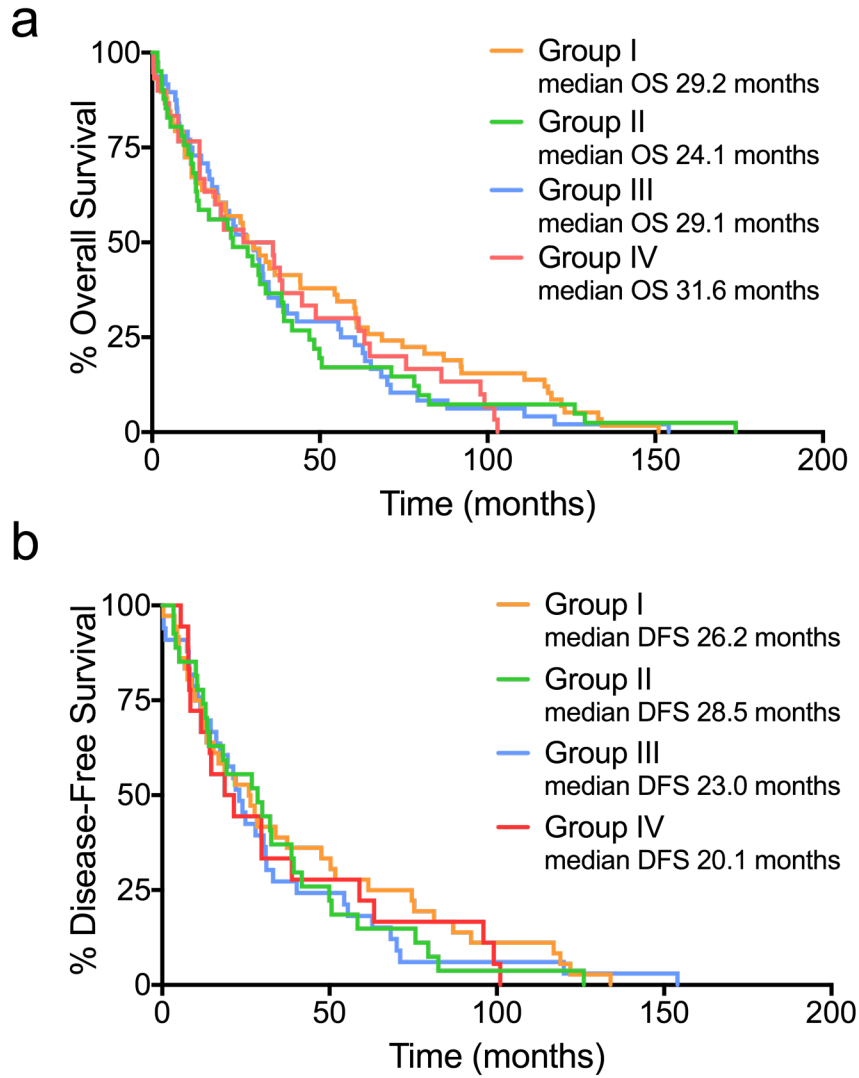

### Supplementary Figure 7

Representative schematic diagram of the CloudNeo pipeline, including the commands that were invoked to illustrate the parameter settings for various tools within the pipeline. Please note that we have substituted our actual project and sample path with simple strings. In addition, please note that the “Specification of Peptides” step generates both the tumor and control peptide files in fasta format and the “Neoantigen Prediction” step is run for both of them separately.

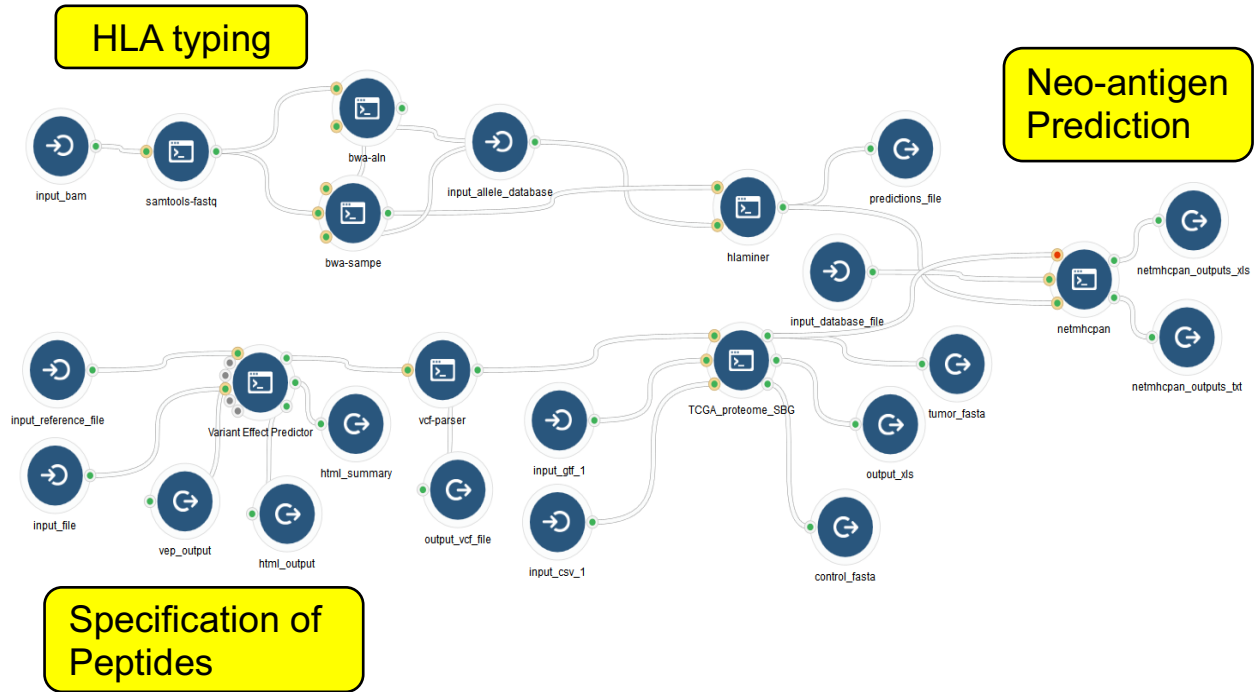



**Supplementary Table 1. Significance values for comparison of immune signature in low versus high neoantigen tumors.** Statistical analysis performed using Student's t-test with Storey's adjustment for false discovery rate (FDR) with multiple comparisons (\*  $p < 0.1$ )

|           | <i>FDR-adj. p</i> |
|-----------|-------------------|
| GZMA      | 0.0575*           |
| GZMB      | 0.0633*           |
| PRF1      | 0.0575*           |
| CD8A      | 0.0575*           |
| EOMES     | 0.0675*           |
| TBX21     | 0.1128            |
| IFNG      | 0.0575*           |
| CXCL9     | 0.0633*           |
| CXCL10    | 0.5298            |
| CXCL11    | 0.2274            |
| CD28      | 0.6327            |
| CD80      | 0.6030            |
| CD86      | 0.6030            |
| ICOS      | 0.6327            |
| ICOSLG    | 0.6418            |
| CD40      | 0.6357            |
| CD70      | 0.2334            |
| TNFSF4    | 0.6030            |
| TNFRSF4   | 0.6030            |
| TNFSF18   | 0.6327            |
| TNFRSF18  | 0.6327            |
| TNFRSF9   | 0.6030            |
| TNFSF13   | 0.6327            |
| TNFSF13B  | 0.4342            |
| TNFRSF13B | 0.6327            |
| TNFRSF13C | 0.6327            |
| TNFRSF17  | 0.6327            |
| CD244     | 0.3879            |
| CCL3      | 0.6327            |
| CCL4      | 0.6030            |
| CCL5      | 0.0575*           |
| CTLA4     | 0.6327            |
| PDCD1     | 0.1291            |
| CD274     | 0.6327            |
| PDCD1LG2  | 0.1668            |
| LAG3      | 0.0575*           |
| IDO1      | 0.6327            |
| HAVCR1    | 0.6030            |
| HAVCR2    | 0.2546            |
| CD160     | 0.1668            |
| BTLA      | 0.3636            |
| TNFRSF14  | 0.6327            |
| IL10      | 0.2546            |
| IL10RB    | 0.6327            |
| PRDM1     | 0.6327            |
| TGFB1     | 0.1790            |
| TGFB2     | 0.3901            |
| TGFB3     | 0.6357            |
| TGFBR1    | 0.4342            |
| TGFBR2    | 0.6030            |
| TGFBR3    | 0.6030            |

**Supplementary Table 2. Significance values for comparison of immune signature between immunophenotypic groups.** Statistical analysis performed using one-way ANOVA with Storey's adjustment for false discovery rate (FDR) with multiple comparisons (\*  $p < 0.05$ , \*\*  $p < 0.01$ , \*\*\*  $p < 0.001$ , \*\*\*\*  $p < 0.0001$ ).

|           | <i>F</i> | <i>p-value</i> | <i>FDR-adj. p</i> |
|-----------|----------|----------------|-------------------|
| GZMA      | 1.606    | 0.1899         | 0.1621            |
| GZMB      | 1.973    | 0.1198         | 0.1159            |
| PRF1      | 2.484    | 0.0625         | 0.0725            |
| CD8A      | 1.518    | 0.2115         | 0.1735            |
| EOMES     | 2.507    | 0.0606         | 0.0725            |
| TBX21     | 5.136    | 0.0020         | 0.0036**          |
| IFNG      | 0.6953   | 0.5561         | 0.3842            |
| CXCL9     | 1.691    | 0.1706         | 0.1500            |
| CXCL10    | 1.504    | 0.2152         | 0.1735            |
| CXCL11    | 0.01778  | 0.9968         | 0.5672            |
| CD28      | 13.86    | <0.0001        | <0.0001****       |
| CD80      | 5.622    | 0.0011         | 0.0025***         |
| CD86      | 13.3     | 0.0001         | 0.0003***         |
| ICOS      | 7.642    | <0.0001        | 0.0003***         |
| ICOSLG    | 3.735    | 0.0123         | 0.0188*           |
| CD40      | 5.34     | 0.0015         | 0.0031**          |
| CD70      | 0.9753   | 0.4057         | 0.2872            |
| TNFSF4    | 3.963    | 0.0092         | 0.0148*           |
| TNFRSF4   | 3.263    | 0.0228         | 0.0315*           |
| TNFSF18   | 1.16     | 0.3267         | 0.2385            |
| TNFRSF18  | 2.075    | 0.1052         | 0.1053            |
| TNFRSF9   | 1.889    | 0.1333         | 0.1209            |
| TNFSF13   | 12.79    | <0.0001        | <0.0001****       |
| TNFSF13B  | 7.266    | 0.0001         | 0.0003***         |
| TNFRSF13B | 8.911    | <0.0001        | 0.0001***         |
| TNFRSF13C | 1.155    | 0.3287         | 0.2385            |
| TNFRSF17  | 5.302    | 0.0016         | 0.0031**          |
| CD244     | 2.615    | 0.0527         | 0.0665            |
| CCL3      | 1.911    | 0.1296         | 0.1209            |
| CCL4      | 0.5231   | 0.6672         | 0.4303            |
| CCL5      | 2.88     | 0.0374         | 0.0493*           |
| CTLA4     | 5.755    | 0.0009         | 0.0024**          |
| PDCD1     | 5.01     | 0.0023         | 0.0039**          |
| CD274     | 0.1594   | 0.9235         | 0.5360            |
| PDCD1LG2  | 0.644    | 0.5877         | 0.3876            |
| LAG3      | 2.109    | 0.1008         | 0.1045            |
| IDO1      | 0.1615   | 0.9221         | 0.5360            |
| HAVCR1    | 1.442    | 0.2322         | 0.1821            |
| HAVCR2    | 9.606    | <0.0001        | 0.0001***         |
| CD160     | 2.248    | 0.0845         | 0.0943            |
| BTLA      | 1.262    | 0.2891         | 0.2208            |
| TNFRSF14  | 9.437    | <0.0001        | 0.0001***         |
| IL10      | 3.647    | 0.0138         | 0.0200*           |
| IL10RB    | 0.1997   | 0.8965         | 0.5360            |
| PRDM1     | 2.147    | 0.0961         | 0.1033            |
| TGFB1     | 8.34     | <0.0001        | 0.0001***         |
| TGFB2     | 0.4481   | 0.7189         | 0.4535            |
| TGFB3     | 5.649    | 0.0010         | 0.0024**          |
| TGFBR1    | 0.1696   | 0.9168         | 0.5360            |
| TGFBR2    | 8.242    | <0.0001        | 0.0002***         |
| TGFBR3    | 0.6525   | 0.5824         | 0.3876            |
